# Supplementary material
Source: HighWire-hosted journal article supplement (https://thorax.bmj.com/content/thoraxjnl-2016-209356)
Supplement: inline-supplementary-material-1 [file inline-supplementary-material-1.pdf]

## Validation of a health-related quality of life instrument for primary ciliary dyskinesia: QOL-PCD

Laura Behan, Margaret W Leigh, Sharon D Dell, Audrey Dunn Galvin, Alexandra L. Quittner, Jane S Lucas.

### On line data supplement

#### Methods

#### Materials

At 'baseline' participants completed the prototype adult version of QOL-PCD questionnaire. QOL-PCD was designed to elicit the participant's opinion of his/her health, not someone else's opinion of it, so family, friends or members of staff should not influence the participant's responses; the questionnaires are designed for self-administration. On completion of the questionnaires, the participant was asked to ensure a response had been given to every question. They were also reminded to contact the study team if they have an exacerbation so that they can complete the form whilst unwell.

They also completed a demographic questionnaire and validated generic questionnaires.

Instructions for completion of questionnaires was provided. The generic questionnaires were:

1. The Short-Form 36 Health Survey (SF-36) was derived from the Medical Outcome Study (1), an observational study that began in 1986 among subjects with cardiac impairment. It is a 36-item self-administered questionnaire that includes eight scales, four of which relate to physical health: physical functioning, physical role limitation, bodily pain and general health perception (2). The remaining four scales are related to mental health: emotional role limitation, mental health, social functioning and vitality. Each scale is scored from 0-100. A score of 100 in physical functioning, role physical, bodily pain, social functioning and role emotion indicate the absence of limitations. In general health, mental health and vitality, the best health corresponds to a score of 50. These eight scales provide two component summary scores: mental component summary (MCS) and physical component summary (PCS) in which normal score is  $50 \pm 10$ .
2. The SNOT-20 is a validated disease-specific health-related quality-of-life measure for rhinosinusitis that consists of 20 items, with each item measured on an ordinal Likert scale from 0 to 5. Higher scores indicate worse symptoms. The first 12 items pertain to specific physical sinonasal symptoms including nasal symptoms (numbers 1–6) and ear or pressure symptoms (numbers 7–10). The final 10 items address more systemic and psychological symptoms, with question numbers 11 to 15 pertaining to sleeping difficulty (3).
3. The St George's Respiratory questionnaire-C (SGRQ-C) is a disease-specific instrument designed to measure impact on overall health, daily life, and perceived well-being in patients with obstructive airways disease. This is a shorter 40-item version of the SGRQ, which does not specify a recall period and has been validated specifically for COPD patients. It produces scores equivalent to the longer instrument and the minimally important difference is the same. (4)

Permission was obtained for use of these generic questionnaires where needed. Multi-trait analysis was used to develop the scales; the analyses of the prototype 49-item questionnaire are in

Supplementary Table E1 and the analyses of the final 40 item questionnaire are in the main document, Table 2.

### **Reliability**

For test-retest reliability, a subgroup of  $\geq 20$  participants were asked to repeat the PCD-QOL questionnaire after 10-14 days. They were required to be stable, based on no change in symptoms or change in medication. Participants were asked to contact the study team if they experienced an exacerbation. A respiratory system exacerbation was defined as respiratory tract symptoms leading to prescription of antibiotic treatment by a doctor consulted by the subject (visit at primary care physician or admission to another hospital), irrespective of results of bacterial culture.

### **Validity**

To assess construct validity, several hypotheses were tested. These hypotheses were developed *a priori* to minimise the risk of type 1 errors. For age, we hypothesised that Physical Functioning, Vitality and Upper and Lower Respiratory Symptoms would worsen in older age groups. For patients who have grown pseudomonas aeruginosa in the past, we predicted Physical Functioning and Upper and Lower Respiratory Symptoms would be associated with worse score. For FEV<sub>1</sub> % predicted, we predicted Physical Functioning, Lower Respiratory Symptoms scores would be more closely associated than Upper Respiratory Scores. For gender, we *a priori* examined differences in Social Functioning, Treatment Burden, and Lower Respiratory Symptom scores.

Convergent validity was assessed by calculating the correlation coefficients between relevant scales of QOL-PCD with the generic questionnaires. Validity was further assessed by examining relationships between scales of QOL-PCD and the generic questionnaire that were not measuring similar constructs (divergent validity).

### References for online supplementary file

1. Ware Jr JE, Sherbourne CD. The MOS 36-item short-form health survey (SF-36): I. Conceptual framework and item selection. *Medical care*. 1992 Jun 1:473-83.
2. Maruish ME (2011) User's manual for the SF-36v2 Health Survey (3rd ed.). Lincoln, RI: QualityMetric Incorporated.
3. Meguro M, Barley EA, Spencer S, Jones PW. Development and validation of an improved, COPD-specific version of the St. George Respiratory Questionnaire. *CHEST Journal*. 2007 Aug 1;132(2):456-63.
4. Piccirillo JF, Merritt MG, Richards ML. Psychometric and clinimetric validity of the 20-item Sino-Nasal Outcome Test (SNOT-20). *Otolaryngology-head and neck surgery*. 2002 Jan 31;126(1):41-7.

Supplementary Table E1: Multi-trait analysis of 49 items from prototype version of QOL-PCD into conceptualised scales, item to scale correlations and Cronbach's alpha for each scale are reported: Physical Functioning, Emotional Functioning, Treatment Burden, Social Functioning, Role Functioning, Health Perception, Vitality, Upper Respiratory Symptoms, Lower Respiratory Symptoms and Ear and Hearing (n = 72, adults $\geq$ 18 years). Correlations between each item and its intended scale are shaded. These analyses informed the development of the 40 item QOL-PCD which underwent full psychometric analyses; the items that were deleted during this process\*\* are detailed in the footnote.

|                                       | <b>Physical</b> | <b>Emotional</b> | <b>Treatment</b> | <b>Social</b> | <b>Role</b> | <b>Health</b> | <b>Vitality</b> | <b>Upper Respiratory</b> | <b>Lower Respiratory</b> | <b>Hearing</b> |
|---------------------------------------|-----------------|------------------|------------------|---------------|-------------|---------------|-----------------|--------------------------|--------------------------|----------------|
| <b>Cronbach's <math>\alpha</math></b> | 0.940           | 0.837            | 0.750            | 0.703         | 0.870       | 0.868         | 0.803           | 0.839                    | 0.883                    | 0.784          |
| q1                                    | 0.795           | 0.604            | 0.563            | 0.642         | 0.691       | 0.749         | 0.572           | 0.430                    | 0.758                    | 0.517          |
| q2                                    | 0.895           | 0.483            | 0.468            | 0.583         | 0.716       | 0.692         | 0.474           | 0.270                    | 0.633                    | 0.394          |
| q3                                    | 0.876           | 0.492            | 0.468            | 0.557         | 0.607       | 0.683         | 0.575           | 0.257                    | 0.673                    | 0.361          |
| q4                                    | 0.858           | 0.403            | 0.399            | 0.442         | 0.560       | 0.563         | 0.435           | 0.266                    | 0.620                    | 0.370          |
| q5**                                  | 0.391           | 0.504            | 0.494            | 0.457         | 0.478       | 0.650         | 0.620           | 0.354                    | 0.498                    | 0.369          |
| q6                                    | 0.468           | 0.669            | 0.534            | 0.413         | 0.426       | 0.612         | 0.76            | 0.390                    | 0.497                    | 0.341          |
| q7                                    | 0.503           | 0.576            | 0.395            | 0.393         | 0.469       | 0.597         | 0.502           | 0.345                    | 0.447                    | 0.244          |
| q8                                    | 0.391           | 0.431            | 0.409            | 0.519         | 0.506       | 0.638         | 0.541           | 0.277                    | 0.388                    | 0.369          |
| q9                                    | 0.567           | 0.558            | 0.657            | 0.412         | 0.606       | 0.637         | 0.666           | 0.312                    | 0.513                    | 0.370          |
| q10                                   | 0.416           | 0.711            | 0.423            | 0.479         | 0.420       | 0.519         | 0.440           | 0.334                    | 0.496                    | 0.346          |
| q11                                   | 0.307           | 0.680            | 0.360            | 0.317         | 0.342       | 0.424         | 0.392           | 0.299                    | 0.365                    | 0.222          |
| q12**                                 | 0.397           | 0.538            | 0.598            | 0.485         | 0.517       | 0.533         | 0.595           | 0.335                    | 0.470                    | 0.442          |

|       |       |       |       |       |       |       |       |       |       |       |
|-------|-------|-------|-------|-------|-------|-------|-------|-------|-------|-------|
| q13   | 0.399 | 0.34  | 0.386 | 0.377 | 0.635 | 0.493 | 0.223 | 0.275 | 0.341 | 0.179 |
| q14   | 0.377 | 0.525 | 0.665 | 0.487 | 0.618 | 0.586 | 0.524 | 0.327 | 0.474 | 0.388 |
| q15   | 0.303 | 0.51  | 0.643 | 0.322 | 0.419 | 0.429 | 0.571 | 0.398 | 0.415 | 0.382 |
| q16   | 0.475 | 0.518 | 0.519 | 0.512 | 0.515 | 0.655 | 0.621 | 0.536 | 0.590 | 0.274 |
| q17** | 0.644 | 0.547 | 0.558 | 0.452 | 0.772 | 0.690 | 0.499 | 0.359 | 0.559 | 0.328 |
| q18   | 0.245 | 0.254 | 0.285 | 0.485 | 0.324 | 0.481 | 0.311 | 0.102 | 0.192 | 0.049 |
| q19   | 0.519 | 0.381 | 0.456 | 0.411 | 0.604 | 0.511 | 0.266 | 0.445 | 0.511 | 0.406 |
| q20   | 0.414 | 0.694 | 0.480 | 0.408 | 0.395 | 0.528 | 0.409 | 0.433 | 0.416 | 0.370 |
| q21   | 0.189 | 0.288 | 0.261 | 0.474 | 0.246 | 0.397 | 0.379 | 0.033 | 0.188 | 0.013 |
| q22** | 0.362 | 0.483 | 0.401 | 0.305 | 0.458 | 0.433 | 0.227 | 0.490 | 0.466 | 0.251 |
| q23   | 0.407 | 0.214 | 0.183 | 0.494 | 0.385 | 0.441 | 0.323 | 0.120 | 0.159 | 0.262 |
| q24   | 0.674 | 0.454 | 0.645 | 0.647 | 0.819 | 0.759 | 0.542 | 0.355 | 0.589 | 0.373 |
| q25** | 0.516 | 0.580 | 0.633 | 0.621 | 0.686 | 0.655 | 0.579 | 0.338 | 0.568 | 0.277 |
| q26   | 0.682 | 0.568 | 0.629 | 0.671 | 0.836 | 0.775 | 0.537 | 0.429 | 0.587 | 0.420 |
| q27   | 0.758 | 0.645 | 0.652 | 0.623 | 0.769 | 0.737 | 0.640 | 0.450 | 0.695 | 0.432 |
| q28   | 0.541 | 0.534 | 0.543 | 0.667 | 0.633 | 0.611 | 0.528 | 0.387 | 0.462 | 0.240 |
| q29   | 0.529 | 0.554 | 0.471 | 0.585 | 0.682 | 0.634 | 0.474 | 0.408 | 0.650 | 0.409 |
| q30   | 0.640 | 0.611 | 0.639 | 0.679 | 0.720 | 0.830 | 0.672 | 0.315 | 0.565 | 0.414 |
| q31   | 0.372 | 0.614 | 0.473 | 0.357 | 0.427 | 0.528 | 0.591 | 0.469 | 0.521 | 0.403 |
| q32   | 0.639 | 0.505 | 0.528 | 0.581 | 0.596 | 0.670 | 0.602 | 0.357 | 0.649 | 0.394 |

|       |       |       |       |       |       |       |       |       |       |       |
|-------|-------|-------|-------|-------|-------|-------|-------|-------|-------|-------|
| q33   | 0.483 | 0.479 | 0.464 | 0.451 | 0.489 | 0.550 | 0.377 | 0.509 | 0.71  | 0.431 |
| q34** | 0.217 | 0.163 | 0.183 | 0.135 | 0.087 | 0.243 | 0.231 | 0.297 | 0.443 | 0.252 |
| q35   | 0.452 | 0.520 | 0.397 | 0.359 | 0.446 | 0.509 | 0.467 | 0.423 | 0.567 | 0.669 |
| q36   | 0.281 | 0.299 | 0.276 | 0.297 | 0.295 | 0.324 | 0.204 | 0.656 | 0.418 | 0.292 |
| q37   | 0.238 | 0.453 | 0.490 | 0.302 | 0.402 | 0.448 | 0.372 | 0.719 | 0.457 | 0.431 |
| q38   | 0.515 | 0.460 | 0.426 | 0.391 | 0.541 | 0.530 | 0.414 | 0.503 | 0.655 | 0.418 |
| q39   | 0.317 | 0.064 | 0.266 | 0.331 | 0.343 | 0.322 | 0.151 | 0.242 | 0.411 | 0.264 |
| q40   | 0.362 | 0.259 | 0.346 | 0.464 | 0.371 | 0.441 | 0.321 | 0.263 | 0.523 | 0.289 |
| q41** | 0.528 | 0.490 | 0.483 | 0.429 | 0.446 | 0.526 | 0.319 | 0.470 | 0.569 | 0.266 |
| q42   | 0.802 | 0.479 | 0.570 | 0.551 | 0.760 | 0.739 | 0.527 | 0.424 | 0.693 | 0.447 |
| q43   | 0.487 | 0.479 | 0.392 | 0.403 | 0.438 | 0.460 | 0.406 | 0.497 | 0.668 | 0.503 |
| q44   | 0.213 | 0.317 | 0.295 | 0.241 | 0.276 | 0.302 | 0.289 | 0.599 | 0.335 | 0.311 |
| q45** | 0.630 | 0.548 | 0.559 | 0.471 | 0.624 | 0.640 | 0.556 | 0.396 | 0.701 | 0.421 |
| q46   | 0.745 | 0.609 | 0.511 | 0.528 | 0.632 | 0.695 | 0.538 | 0.499 | 0.74  | 0.426 |
| q47** | 0.409 | 0.561 | 0.575 | 0.444 | 0.451 | 0.578 | 0.407 | 0.516 | 0.620 | 0.288 |
| q48   | 0.371 | 0.289 | 0.326 | 0.241 | 0.307 | 0.317 | 0.281 | 0.416 | 0.402 | 0.669 |
| q49   | 0.219 | 0.344 | 0.412 | 0.336 | 0.360 | 0.382 | 0.271 | 0.747 | 0.451 | 0.467 |

**Supplementary Table E2:** Multi-trait analysis of QOL-PCD scales showing item to scale correlations: Physical Functioning, Emotional Functioning, Treatment Burden, Social Functioning, Role Functioning, Health Perception, Vitality, Upper Respiratory Symptoms, Lower Respiratory symptoms and Ear and Hearing Symptoms (n = 72, adults $\geq$ 18 years). We required item to scale correlations  $\geq$ 0.40 with the intended scale (shaded) and much lower correlations with the competing scales.

|             | Physical | Emotional | Treatment | Social | Role  | Health | Vitality | Upper<br>Respiratory | Lower<br>Respiratory | Hearing |
|-------------|----------|-----------|-----------|--------|-------|--------|----------|----------------------|----------------------|---------|
| Physical 1  | 0.880    | 0.502     | 0.463     | 0.408  | 0.705 | 0.728  | 0.527    | 0.387                | 0.715                | 0.474   |
| Physical 2  | 0.873    | 0.471     | 0.445     | 0.393  | 0.762 | 0.688  | 0.465    | 0.243                | 0.542                | 0.364   |
| Physical 3  | 0.863    | 0.445     | 0.424     | 0.328  | 0.629 | 0.672  | 0.508    | 0.229                | 0.590                | 0.315   |
| Physical 4  | 0.801    | 0.323     | 0.315     | 0.266  | 0.562 | 0.528  | 0.371    | 0.154                | 0.461                | 0.359   |
| Physical 5  | 0.906    | 0.515     | 0.573     | 0.196  | 0.742 | 0.711  | 0.471    | 0.430                | 0.659                | 0.395   |
| Emotional 1 | 0.495    | 0.766     | 0.343     | 0.247  | 0.523 | 0.623  | 0.514    | 0.299                | 0.402                | 0.239   |
| Emotional 2 | 0.428    | 0.782     | 0.281     | 0.316  | 0.408 | 0.466  | 0.374    | 0.267                | 0.453                | 0.300   |
| Emotional 3 | 0.309    | 0.723     | 0.281     | 0.121  | 0.361 | 0.452  | 0.390    | 0.265                | 0.273                | 0.196   |
| Emotional 4 | 0.307    | 0.629     | 0.366     | 0.220  | 0.404 | 0.450  | 0.295    | 0.368                | 0.306                | 0.345   |
| Emotional 5 | 0.418    | 0.757     | 0.444     | 0.161  | 0.416 | 0.527  | 0.539    | 0.471                | 0.512                | 0.330   |
| Treatment 1 | 0.397    | 0.198     | 0.598     | 0.137  | 0.542 | 0.497  | 0.244    | 0.217                | 0.259                | 0.164   |

|             |       |       |       |       |       |       |       |       |       |        |
|-------------|-------|-------|-------|-------|-------|-------|-------|-------|-------|--------|
| Treatment 2 | 0.423 | 0.330 | 0.805 | 0.236 | 0.527 | 0.550 | 0.409 | 0.288 | 0.414 | 0.333  |
| Treatment 3 | 0.280 | 0.308 | 0.730 | 0.211 | 0.407 | 0.312 | 0.462 | 0.381 | 0.318 | 0.313  |
| Treatment 4 | 0.368 | 0.505 | 0.736 | 0.262 | 0.522 | 0.596 | 0.628 | 0.445 | 0.472 | 0.239  |
| Social 1    | 0.273 | 0.161 | 0.284 | 0.814 | 0.357 | 0.452 | 0.324 | 0.055 | 0.286 | 0.055  |
| Social 2    | 0.151 | 0.231 | 0.220 | 0.861 | 0.185 | 0.306 | 0.367 | 0.015 | 0.138 | -0.006 |
| Social 3    | 0.431 | 0.206 | 0.157 | 0.710 | 0.447 | 0.364 | 0.327 | 0.100 | 0.193 | 0.250  |
| Role 1      | 0.562 | 0.336 | 0.434 | 0.204 | 0.731 | 0.431 | 0.225 | 0.432 | 0.498 | 0.389  |
| Role 2      | 0.741 | 0.508 | 0.668 | 0.305 | 0.868 | 0.774 | 0.594 | 0.359 | 0.535 | 0.354  |
| Role 3      | 0.647 | 0.493 | 0.588 | 0.406 | 0.899 | 0.751 | 0.521 | 0.382 | 0.541 | 0.417  |
| Role 4      | 0.717 | 0.548 | 0.598 | 0.314 | 0.812 | 0.746 | 0.629 | 0.372 | 0.664 | 0.395  |
| Health 1    | 0.529 | 0.506 | 0.563 | 0.541 | 0.628 | 0.808 | 0.580 | 0.328 | 0.427 | 0.263  |
| Health 2    | 0.608 | 0.563 | 0.435 | 0.293 | 0.686 | 0.784 | 0.442 | 0.388 | 0.666 | 0.386  |
| Health 3    | 0.697 | 0.642 | 0.662 | 0.391 | 0.725 | 0.923 | 0.678 | 0.307 | 0.585 | 0.396  |
| Health 4    | 0.704 | 0.524 | 0.560 | 0.301 | 0.582 | 0.781 | 0.653 | 0.364 | 0.628 | 0.386  |
| Vitality 1  | 0.577 | 0.576 | 0.458 | 0.382 | 0.394 | 0.533 | 0.893 | 0.337 | 0.410 | 0.269  |

|                |        |       |       |        |       |       |       |       |       |       |
|----------------|--------|-------|-------|--------|-------|-------|-------|-------|-------|-------|
| Vitality 2     | 0.681  | 0.377 | 0.428 | 0.400  | 0.549 | 0.647 | 0.749 | 0.271 | 0.463 | 0.396 |
| Vitality 3     | 0.354  | 0.526 | 0.618 | 0.240  | 0.526 | 0.594 | 0.836 | 0.322 | 0.380 | 0.290 |
| Upper Resp 1   | 0.311  | 0.316 | 0.274 | 0.041  | 0.366 | 0.307 | 0.221 | 0.836 | 0.484 | 0.281 |
| Upper Resp 2   | 0.315  | 0.406 | 0.462 | 0.085  | 0.402 | 0.373 | 0.352 | 0.827 | 0.452 | 0.439 |
| Upper Resp 3   | 0.210  | 0.322 | 0.227 | -0.074 | 0.321 | 0.222 | 0.267 | 0.762 | 0.374 | 0.287 |
| Upper Resp 4   | 0.249  | 0.342 | 0.366 | 0.129  | 0.347 | 0.380 | 0.288 | 0.821 | 0.456 | 0.470 |
| Lower Resp 1   | 0.513  | 0.428 | 0.467 | 0.194  | 0.543 | 0.599 | 0.391 | 0.472 | 0.821 | 0.429 |
| Lower Resp 2   | 0.463  | 0.460 | 0.380 | 0.079  | 0.522 | 0.501 | 0.362 | 0.507 | 0.717 | 0.414 |
| Lower Resp 3   | 0.343  | 0.127 | 0.323 | 0.162  | 0.400 | 0.352 | 0.230 | 0.250 | 0.649 | 0.267 |
| Lower Resp 4   | 0.367  | 0.240 | 0.314 | 0.351  | 0.336 | 0.458 | 0.298 | 0.281 | 0.679 | 0.286 |
| Lower Resp 5   | 0.461  | 0.488 | 0.355 | 0.144  | 0.443 | 0.452 | .346  | 0.503 | 0.751 | 0.496 |
| Lower Resp 6   | 0.711* | 0.546 | 0.490 | 0.263  | 0.615 | 0.643 | 0.467 | 0.455 | 0.694 | 0.448 |
| Ear and Hear 1 | 0.416  | 0.415 | 0.315 | 0.107  | 0.443 | 0.478 | 0.424 | 0.434 | 0.538 | 0.931 |
| Ear and Hear 2 | 0.364  | 0.232 | 0.292 | 0.073  | 0.357 | 0.289 | 0.221 | 0.408 | 0.435 | 0.886 |

\* item correlation with competing scale higher than its correlation with its own scale.



Footnote: Reasons for deleting items\*\*

**Item**

- Q5: You felt well
- Q12: You were frustrated about doing your treatment
- Q17: I have to stay home more than I want to
- Q22: It is difficult to be intimate with a partner (kissing, hugging, sexual activity)
- Q25: How often were you absent from work, school, or unable to complete daily activities because of your illness or treatments?
- Q34: You coughed during the day
- Q41: You had trouble sleeping because of coughing
- Q45: Your chest hurt
- Q47: You had trouble sleeping due to congestion

**Reason for removing item**

- Overlap with Q30. Endorsement better in Q30
- Poor endorsement alpha not affected by removal.
- Did not fit with a conceptual scale, Endorsement <20%
- Did not fit with a conceptual scale, endorsement <20%
- Low endorsement <20% and multiple cross-loadings
- Similar questions more discriminatory, did not improve conceptual scale.
- Did not fit with a conceptual scale, endorsement <20%
- Low endorsement <20%
- Low endorsement <20% and did not fit with a conceptual scale,

**Supplementary Table E3:** Responsiveness to change was measured, paired t-tests compared scores (SD) for each scale in 10 patients who completed QOL-PCD whilst stable and during an exacerbation.

|                  | <b>Stable</b> | <b>Exacerbation</b> | <b>Mean Difference</b>  | <b>P-value</b> |
|------------------|---------------|---------------------|-------------------------|----------------|
|                  |               |                     | <b>(95% CI)</b>         |                |
| <b>Physical</b>  | 41.33 (37.55) | 26.00 (34.20)       | 15.33<br>(1.47-29.20)   | 0.03           |
| <b>Emotional</b> | 67.33 (27.12) | 63.33 (23.63)       | 4.00<br>(-6.35-14.35)   | 0.41           |
| <b>Treatment</b> | 49.16 (26.77) | 39.16 (23.58)       | 10.00<br>(0.05-20.05)   | 0.05           |
| <b>Social</b>    | 38.88 (26.31) | 43.33 (21.24)       | -4.44<br>(-20.42-11.54) | 0.54           |
| <b>Role</b>      | 45.83 (36.05) | 31.66(30.63)        | 14.16<br>(4.41-23.92)   | 0.01           |
| <b>Health</b>    | 38.33 (27.8)  | 27.50 (20.80)       | 10.83<br>(20.58-1.08)   | 0.03           |

|                          |               |               |                            |      |
|--------------------------|---------------|---------------|----------------------------|------|
| <b>Vitality</b>          | 45.55 (25.89) | 27.77 (22.98) | 17.77<br>(3.66-31.91)      | 0.02 |
| <b>Upper respiratory</b> | 45.83 (22.65) | 36.66 (26.11) | 9.16<br>(0.34-18.67)       | 0.05 |
| <b>Lower respiratory</b> | 38.88 (24.14) | 28.33 (19.67) | 10.56<br>(0.74-20.37)      | 0.03 |
| <b>Ears and Hearing</b>  | 41.66 (29.65) | 43.33 (28.54) | -1.66<br>(-14.78 - -11.45) | 0.78 |
